# Supplementary material
Source: bioRxiv or medRxiv preprint supplement (https://www.biorxiv.org/highwire/filestream/9032/field_highwire_adjunct_files/0/033720-1.pdf)
Supplement: Supplementary file [file 033720-1.pdf]

# Vital rates, source-sink dynamics, and type of competition in congeneric species

Simone Vincenzi<sup>1,2\*</sup>, Dusan Jesensek<sup>3</sup>, Alain J Crivelli<sup>4</sup>

<sup>1</sup>Center for Stock Assessment Research, Department of Applied Mathematics and Statistics, University of California, Santa Cruz,

CA 95064, [simon.vincenz@gmail.com](mailto:simon.vincenz@gmail.com)

<sup>2</sup>Dipartimento di Elettronica, Informazione e Bioingegneria Politecnico di Milano, Via Ponzio 34/5, I-20133 Milan, Italy

<sup>3</sup>Tolmin Angling Association, Most na Soci, Slovenia, [rdt.val@siol.net](mailto:rdt.val@siol.net)

<sup>4</sup>Station Biologique de la Tour du Valat, Le Sambuc, F-13200, Arles, France, [a.crivelli@tourduvalat.org](mailto:a.crivelli@tourduvalat.org)

\*Corresponding author, [simon.vincenz@gmail.com](mailto:simon.vincenz@gmail.com); tel: +1-831-420-3936; fax not available

**Table S1.** Topological characteristics of Upper Volaja. Stream altitude is between 725 (Sector 4) and 683 (Sector 1) m.

| Sector | Length (m) | Area (m <sup>2</sup> ) | Slope     | Number of pools | Pool area (m <sup>2</sup> ) |
|--------|------------|------------------------|-----------|-----------------|-----------------------------|
| 1      | 44.52      | 136.57                 | 13%       | 5               | 65.59                       |
| 2      | 78.53      | 254.59                 | 17%       | 5               | 88.55                       |
| 3      | 47.72      | 134.57                 | 16%       | 3               | 43.46                       |
| 4      | 93.87      | 220.54                 | 15%       | 4               | 60.74                       |
| Total  | 264.64     | 746.27                 | 15% (avg) | 17              | 258.34                      |

**Table S2.** Symbols and abbreviations used in the main text.

| <i>Symbol or Abbreviation</i> | <i>Explanation</i>                                                                         |
|-------------------------------|--------------------------------------------------------------------------------------------|
| $GDDs$                        | Growing degree-days                                                                        |
| $D_{0+}$                      | Density of age-0+ fish                                                                     |
| $D_{>0+}$                     | Density of fish older than 0+                                                              |
| $L_{0+}, \bar{L}_{0+}$        | Length and mean length of fish at age 0+                                                   |
| vBGF                          | Von Bertalanffy growth function                                                            |
| $L_{\infty}$                  | Asymptotic size in the vBGF                                                                |
| $k$                           | Growth coefficient in the vBGF                                                             |
| $t_0$                         | Age at which size is equal to 0 in the vBGF                                                |
| $u$                           | Individual random effect for vBGF's $k$                                                    |
| $v$                           | Individual random effect for vBGF's $L_{\infty}$                                           |
| $\sigma_u$                    | Standard deviation of the distribution of individual random effect for vBGF's $k$          |
| $\sigma_v$                    | Standard deviation of the distribution of individual random effect for vBGF's $L_{\infty}$ |

|                          |                                                                                                                                                                               |
|--------------------------|-------------------------------------------------------------------------------------------------------------------------------------------------------------------------------|
| $x_{ij}$                 | Continuous predictor of vBGF's parameters for individual $i$ in group $j$                                                                                                     |
| $\varepsilon_{ij}$       | Error term of the vBGF for individual $i$ in group $j$                                                                                                                        |
| $\sigma_{\varepsilon}^2$ | Variance of the error term for the vBGF                                                                                                                                       |
| $\alpha, \beta$          | Categorical predictors of vBGF's parameters for individual $i$ in group $j$                                                                                                   |
| $D_{>0+,born}$           | Density of fish older than 0+ when the fish/cohort was born                                                                                                                   |
| $D_{>0+,m}$              | Mean of $D_{>0+}$ at year $t$ in September and $t+1$ in June                                                                                                                  |
| <i>Cohort</i>            | Year-class                                                                                                                                                                    |
| Data <sub>W</sub>        | Whole dataset                                                                                                                                                                 |
| Data <sub>S</sub>        | Dataset including (a) trout that were sampled once at age 1+, and (b) trout that were sampled multiple times in the same sector and were sampled for the first time at age 1+ |
| Data <sub>D</sub>        | Dataset including all cohorts for which density and water temperature in the first year of life are known                                                                     |
| $G_d$                    | Daily growth in size                                                                                                                                                          |
| <i>Season</i>            | Sampling season: June-September ( <i>Summer</i> ), September-June ( <i>Winter</i> )                                                                                           |
| $D_{s,t}$                | Density of spawners at year $t$                                                                                                                                               |
| $R_t$                    | Recruitment (density of age-0+ in September) at year $t$                                                                                                                      |
| GAM                      | Generalized Additive Model                                                                                                                                                    |

|               |                                                 |
|---------------|-------------------------------------------------|
| GAMM          | Generalized Additive Mixed-Model                |
| $\bar{T}$     | Mean temperature during a <i>Season</i>         |
| <i>Time</i>   | Sampling occasion in the model of survival      |
| $\phi$        | Apparent survival                               |
| $p$           | Probability of capture in the model of survival |
| CJS           | Cormack-Jolly-Seber model of survival           |
| $\sigma_{0+}$ | Apparent survival of fish from age 0+ to age 1+ |

**Table S3.** Estimated number of fish ( $N_{est} \pm Std.est$ ) alive in each *Year* and *Season* for fish aged 0+ (0) or 1+ (1) and older. LCI and UCI are 95% CI for number ( $N_{\_}$ ) and density ( $D_{\_}$ ) of fish. p.capt and std.p.capt are point estimate and standard error of probability of capture at a single pass. There was complete recruitment failure in 2014. Density is in fish  $ha^{-1}$ .

| Year | Sampling | $N_{est}$ | Std.est | p.capt | Std.p.capt | $N_{LCI}$ | NUCI   | Dest    | DLCI    | DUCI    | Age |
|------|----------|-----------|---------|--------|------------|-----------|--------|---------|---------|---------|-----|
| 2004 | Sept     | 59        | 0.70    | 0.92   | 0.04       | 57.62     | 60.38  | 790.60  | 772.11  | 809.09  | 0   |
| 2005 | Sept     | 60        | 1.00    | 0.90   | 0.05       | 58.03     | 61.97  | 804.00  | 777.64  | 830.36  | 0   |
| 2006 | Sept     | 30        | 0.39    | 0.94   | 0.05       | 29.24     | 30.76  | 402.00  | 391.79  | 412.21  | 0   |
| 2007 | Sept     | 38        | 0.91    | 0.88   | 0.06       | 36.21     | 39.79  | 509.20  | 485.26  | 533.14  | 0   |
| 2008 | Sept     | 33        | 2.96    | 0.72   | 0.12       | 27.19     | 38.81  | 442.20  | 364.41  | 519.99  | 0   |
| 2009 | Sept     | 15        | 0.27    | 0.94   | 0.07       | 14.46     | 15.54  | 201.00  | 193.78  | 208.22  | 0   |
| 2010 | Sept     | 8         | 0.87    | 0.80   | 0.19       | 6.30      | 9.70   | 107.20  | 84.46   | 129.94  | 0   |
| 2011 | Sept     | 17        | 1.18    | 0.81   | 0.13       | 14.69     | 19.31  | 227.80  | 196.90  | 258.70  | 0   |
| 2012 | Sept     | 53        | 1.08    | 0.88   | 0.05       | 50.88     | 55.12  | 710.20  | 681.81  | 738.59  | 0   |
| 2013 | Sept     | 24        | 1.89    | 0.77   | 0.13       | 20.29     | 27.71  | 321.60  | 271.93  | 371.27  | 0   |
| 2014 | Sept     | 0         | 0.00    | 0.00   | 0.00       | 0.00      | 0.00   | 0.00    | 0.00    | 0.00    | 0   |
| 2015 | Sept     | 65        | 1.44    | 0.86   | 0.05       | 62.17     | 67.83  | 871.00  | 833.10  | 908.90  | 0   |
| 2004 | Sept     | 548       | 2.86    | 0.90   | 0.01       | 542.40    | 553.60 | 7343.20 | 7268.13 | 7418.27 | 1   |
| 2005 | June     | 468       | 2.63    | 0.90   | 0.02       | 462.85    | 473.15 | 6271.20 | 6202.23 | 6340.17 | 1   |
| 2005 | Sept     | 503       | 1.22    | 0.95   | 0.01       | 500.61    | 505.39 | 6740.20 | 6708.15 | 6772.25 | 1   |
| 2006 | June     | 388       | 2.19    | 0.91   | 0.02       | 383.71    | 392.29 | 5199.20 | 5141.73 | 5256.67 | 1   |
| 2006 | Sept     | 374       | 1.38    | 0.94   | 0.01       | 371.29    | 376.71 | 5011.60 | 4975.35 | 5047.85 | 1   |

|      |      |     |      |      |      |        |        |         |         |         |   |
|------|------|-----|------|------|------|--------|--------|---------|---------|---------|---|
| 2007 | June | 390 | 1.76 | 0.92 | 0.02 | 386.55 | 393.45 | 5226.00 | 5179.83 | 5272.17 | 1 |
| 2007 | Sept | 391 | 1.46 | 0.94 | 0.01 | 388.14 | 393.86 | 5239.40 | 5201.04 | 5277.76 | 1 |
| 2008 | June | 413 | 2.71 | 0.89 | 0.02 | 407.69 | 418.31 | 5534.20 | 5463.01 | 5605.39 | 1 |
| 2008 | Sept | 422 | 1.91 | 0.92 | 0.01 | 418.26 | 425.74 | 5654.80 | 5604.75 | 5704.85 | 1 |
| 2009 | June | 335 | 3.39 | 0.86 | 0.02 | 328.35 | 341.65 | 4489.00 | 4399.96 | 4578.04 | 1 |
| 2009 | Sept | 366 | 2.14 | 0.91 | 0.02 | 361.81 | 370.19 | 4904.40 | 4848.21 | 4960.59 | 1 |
| 2010 | June | 400 | 1.44 | 0.94 | 0.01 | 397.17 | 402.83 | 5360.00 | 5322.13 | 5397.87 | 1 |
| 2010 | Sept | 337 | 2.18 | 0.90 | 0.02 | 332.72 | 341.28 | 4515.80 | 4458.51 | 4573.09 | 1 |
| 2011 | June | 323 | 2.31 | 0.90 | 0.02 | 318.48 | 327.52 | 4328.20 | 4267.64 | 4388.76 | 1 |
| 2011 | Sept | 371 | 1.81 | 0.92 | 0.02 | 367.45 | 374.55 | 4971.40 | 4923.88 | 5018.92 | 1 |
| 2012 | June | 326 | 2.23 | 0.90 | 0.02 | 321.64 | 330.36 | 4368.40 | 4309.95 | 4426.85 | 1 |
| 2012 | Sept | 357 | 1.79 | 0.92 | 0.02 | 353.50 | 360.50 | 4783.80 | 4736.84 | 4830.76 | 1 |
| 2013 | June | 379 | 2.22 | 0.91 | 0.02 | 374.65 | 383.35 | 5078.60 | 5020.32 | 5136.88 | 1 |
| 2013 | Sept | 338 | 2.24 | 0.90 | 0.02 | 333.60 | 342.40 | 4529.20 | 4470.27 | 4588.13 | 1 |
| 2014 | June | 419 | 2.51 | 0.90 | 0.02 | 414.08 | 423.92 | 5614.60 | 5548.74 | 5680.46 | 1 |
| 2014 | Sept | 435 | 2.33 | 0.91 | 0.02 | 430.43 | 439.57 | 5829.00 | 5767.79 | 5890.21 | 1 |
| 2015 | June | 331 | 0.98 | 0.95 | 0.01 | 329.08 | 332.92 | 4435.40 | 4409.63 | 4461.17 | 1 |
| 2015 | Sept | 327 | 1.88 | 0.91 | 0.02 | 323.31 | 330.69 | 4381.80 | 4332.37 | 4431.23 | 1 |

**Table S4.** Proportion of “late incomers” present in the population each year in September. We applied the same ratio of “late incomers” to total number of fish found for cohorts born after the start of sampling to cohorts born before the start of sampling (from 2000 to 2003). Early.inc = “early incomers”, i.e. fish that were either born in Upper Volaja or came into Upper Volaja before age 1+ in September. FP\_Coh = number of fish from cohorts born before the start of sampling. N.tot = total number of fish aged 1+ or older sampled each September. Late.inc = “late incomers”, i.e. fish that were born in AW and came into Upper Volaja when 1+ in September or older. Prop.late.inc = proportion of “late incomers” in Upper Volaja each year in September.

| Year | Early.inc | FP_Coh | N.tot | Late.inc | Prop.late.inc |
|------|-----------|--------|-------|----------|---------------|
| 2010 | 198       | 13     | 334   | 128      | 0.38          |
| 2011 | 216       | 8      | 369   | 148      | 0.40          |
| 2012 | 208       | 6      | 355   | 143      | 0.40          |
| 2013 | 226       | 5      | 335   | 106      | 0.32          |
| 2014 | 293       | 6      | 432   | 135      | 0.31          |
| 2015 | 225       | 1      | 325   | 99       | 0.30          |



**Table S5.** Predictors of vBGF's parameters  $L_{\infty}$  and  $k$  (*Constant* = no predictors except for individual random effects), number of parameters, and AIC of the tested growth models (dataset Data<sub>w</sub>; only September data).

| $L_{\infty}$    | $k$             | $npar$ | $AIC$   |
|-----------------|-----------------|--------|---------|
| <i>Cohort</i>   | <i>Cohort</i>   | 32     | 40608.0 |
| <i>Constant</i> | <i>Cohort</i>   | 19     | 40736.2 |
| <i>Cohort</i>   | <i>Constant</i> | 19     | 40831.2 |
| <i>Constant</i> | <i>Constant</i> | 6      | 41687.4 |

**Table S6.** Cohort-specific point estimates and 95% CI of vBGF's parameters, number of data points (DP), predicted (P\_L) and observed (O\_L) mean size at age 1+ to 3+. NA means data not available. Avg is for parameters, predictions for the model with no predictors (and observations for all brown trout in the dataset).

| Cohort | Linf   | Linf_lcl | Linf_ucl | k    | k_lcl | k_ucl | t <sub>0</sub> | t <sub>0_lcl</sub> | t <sub>0_ucl</sub> | DP   | P_L1   | P_L2   | P_L3   | O_L1   | O_L2   | O_L3   |
|--------|--------|----------|----------|------|-------|-------|----------------|--------------------|--------------------|------|--------|--------|--------|--------|--------|--------|
| C00    | 279.46 | 241.27   | 317.65   | 0.51 | 0.05  | 0.98  | -1.61          | -1.72              | -1.51              | 10   | 206.37 | 235.71 | 253.27 | NA     | NA     | NA     |
| C01    | 246.44 | 234.25   | 258.63   | 0.60 | 0.43  | 0.78  | -1.61          | -1.72              | -1.51              | 58   | 195.73 | 218.74 | 231.32 | NA     | NA     | 232.79 |
| C02    | 228.55 | 223.00   | 234.10   | 0.50 | 0.45  | 0.54  | -1.61          | -1.72              | -1.51              | 382  | 165.91 | 190.37 | 205.29 | NA     | 191.17 | 203.45 |
| C03    | 240.28 | 234.26   | 246.30   | 0.33 | 0.30  | 0.35  | -1.61          | -1.72              | -1.51              | 721  | 137.80 | 166.31 | 186.89 | 137.56 | 164.39 | 184.74 |
| C04    | 227.04 | 221.41   | 232.67   | 0.34 | 0.32  | 0.37  | -1.61          | -1.72              | -1.51              | 501  | 134.15 | 161.05 | 180.17 | 131.20 | 162.88 | 183.16 |
| C05    | 227.11 | 221.55   | 232.67   | 0.33 | 0.30  | 0.35  | -1.61          | -1.72              | -1.51              | 548  | 130.35 | 157.30 | 176.75 | 130.10 | 158.45 | 177.78 |
| C06    | 229.34 | 223.62   | 235.06   | 0.32 | 0.30  | 0.34  | -1.61          | -1.72              | -1.51              | 461  | 129.53 | 156.74 | 176.53 | 130.54 | 155.82 | 174.78 |
| C07    | 226.24 | 219.47   | 233.01   | 0.32 | 0.29  | 0.34  | -1.61          | -1.72              | -1.51              | 322  | 127.98 | 154.83 | 174.34 | 126.97 | 156.38 | 172.34 |
| C08    | 225.68 | 218.99   | 232.37   | 0.32 | 0.30  | 0.35  | -1.61          | -1.72              | -1.51              | 353  | 128.61 | 155.40 | 174.79 | 128.95 | 153.12 | 172.64 |
| C09    | 236.13 | 228.22   | 244.04   | 0.29 | 0.27  | 0.32  | -1.61          | -1.72              | -1.51              | 336  | 126.87 | 154.78 | 175.55 | 125.12 | 155.80 | 176.32 |
| C10    | 252.69 | 240.26   | 265.12   | 0.27 | 0.24  | 0.30  | -1.61          | -1.72              | -1.51              | 258  | 126.86 | 156.32 | 178.89 | 126.35 | 154.69 | 178.09 |
| C11    | 244.56 | 229.16   | 259.96   | 0.30 | 0.26  | 0.34  | -1.61          | -1.72              | -1.51              | 153  | 132.05 | 160.97 | 182.45 | 128.38 | 160.89 | 185.60 |
| C12    | 314.89 | 282.84   | 346.94   | 0.21 | 0.17  | 0.24  | -1.61          | -1.72              | -1.51              | 277  | 130.89 | 165.08 | 192.92 | 128.87 | 168.43 | 192.29 |
| C13    | 258.97 | 235.52   | 282.42   | 0.29 | 0.24  | 0.34  | -1.61          | -1.72              | -1.51              | 210  | 137.58 | 168.13 | 191.00 | 136.31 | 170.46 | NA     |
| Avg    | 224.87 | 222.21   | 227.53   | 0.41 | 0.39  | 0.43  | -1.25          | -1.34              | -1.17              | 4590 | 134.99 | 165.06 | 185.07 | 131.98 | 165.91 | 184.49 |

**Table S7.** Sector-specific point estimates and 95% CI of vBGF's parameters, number of data points (DP), predicted (P\_L) and observed (O\_L) mean size at age 1+ to 3+.

| Sector | Linf   | Linf_lcl | Linf_ucl | k    | k_lcl | k_ucl | t <sub>0</sub> | t <sub>0_lcl</sub> | t <sub>0_ucl</sub> | DP  | P_L1   | P_L2   | P_L3   | O_L1   | O_L2   | O_L3   |
|--------|--------|----------|----------|------|-------|-------|----------------|--------------------|--------------------|-----|--------|--------|--------|--------|--------|--------|
| 1      | 213.29 | 204.93   | 221.65   | 0.41 | 0.37  | 0.46  | -1.27          | -1.42              | -1.11              | 328 | 129.69 | 158.00 | 176.73 | 130.53 | 157.59 | 175.70 |
| 2      | 213.10 | 205.55   | 220.65   | 0.42 | 0.37  | 0.47  | -1.27          | -1.42              | -1.11              | 611 | 130.81 | 159.03 | 177.58 | 131.03 | 158.67 | 177.91 |
| 3      | 220.14 | 209.58   | 230.70   | 0.40 | 0.35  | 0.46  | -1.27          | -1.42              | -1.11              | 322 | 132.09 | 161.38 | 180.93 | 132.51 | 161.42 | 181.00 |
| 4      | 230.64 | 220.38   | 240.90   | 0.39 | 0.34  | 0.44  | -1.27          | -1.42              | -1.11              | 378 | 134.82 | 165.62 | 186.52 | 134.99 | 166.85 | 184.58 |

**Table S8.** Recapture models for the “global model” of probability of survival  $\phi(\text{Cohort} * \text{Season})$ . The best recapture model was  $p(\text{Time})$ .

| Model                                                                     | npar | AIC      | $\Delta$ AIC | weight   | neg2lnl  |
|---------------------------------------------------------------------------|------|----------|--------------|----------|----------|
| $\phi(\text{Cohort} * \text{Season}) p(\sim \text{Time})$                 | 52   | 13520.62 | 0            | 0.74     | 13416.62 |
| $\phi(\text{Cohort} * \text{Season}) p(\sim \text{Season} + \text{Time})$ | 53   | 13522.74 | 2.12         | 0.26     | 13416.74 |
| $\phi(\text{Cohort} * \text{Season}) p(\sim \text{Season} * \text{Time})$ | 63   | 13542.74 | 22.12        | 1.17E-05 | 13416.74 |
| $\phi(\text{Cohort} * \text{Season}) p(\sim \text{Season})$               | 32   | 13594.99 | 74.36        | 5.28E-17 | 13530.99 |
| $\phi(\text{Cohort} * \text{Season}) p(\sim \text{bs}(\text{Age}))$       | 34   | 13597.31 | 76.68        | 1.65E-17 | 13529.31 |
| $\phi(\text{Cohort} * \text{Season}) p(\sim \text{Age})$                  | 32   | 13600.42 | 79.79        | 3.50E-18 | 13536.41 |
| $\phi(\text{Cohort} * \text{Season}) p(\sim 1)$                           | 31   | 13605.27 | 84.65        | 3.08E-19 | 13543.27 |
| $\phi(\text{Cohort} * \text{Season}) p(\sim \text{Cohort})$               | 45   | 13608.68 | 88.06        | 5.60E-20 | 13518.68 |

**Figure S1**

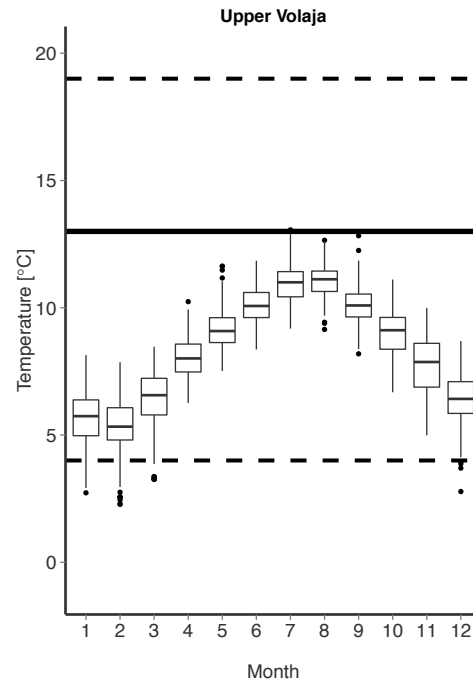

**Fig. S1.** Boxplots of water temperature recorded (by month) in Upper Volaja between 2004 and 2014. Dashed lines enclose the range of temperatures allowing growth and the thick solid line identifies the temperature for maximum growth according to Elliott et al. (1995).

**Figure S2**

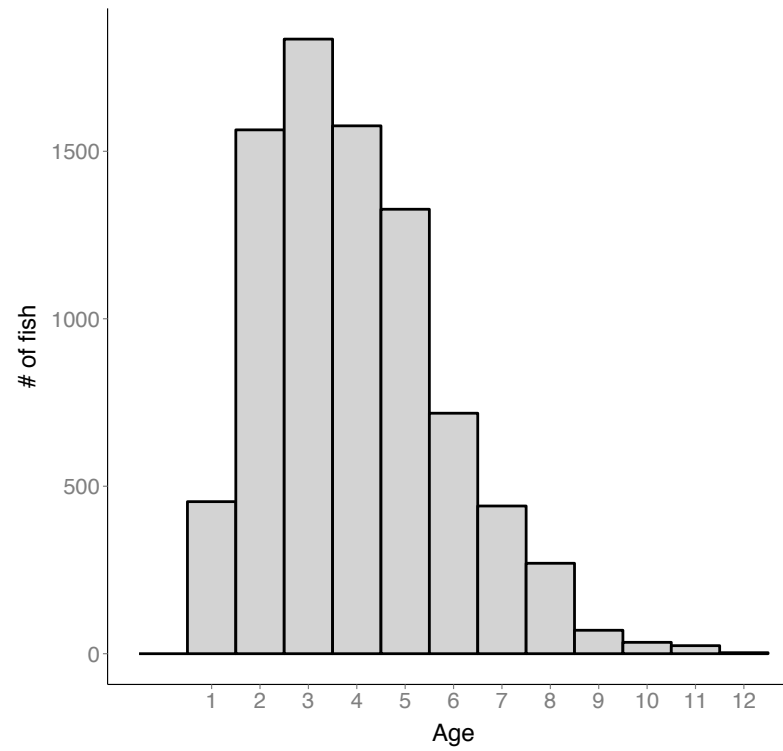

**Figure S2.** Age at (apparent) death (i.e. maximum age at which the fish was sampled) for tagged brown trout in Upper Volaja.

Most fish did not survive past 6 years old.

**Figure S3**

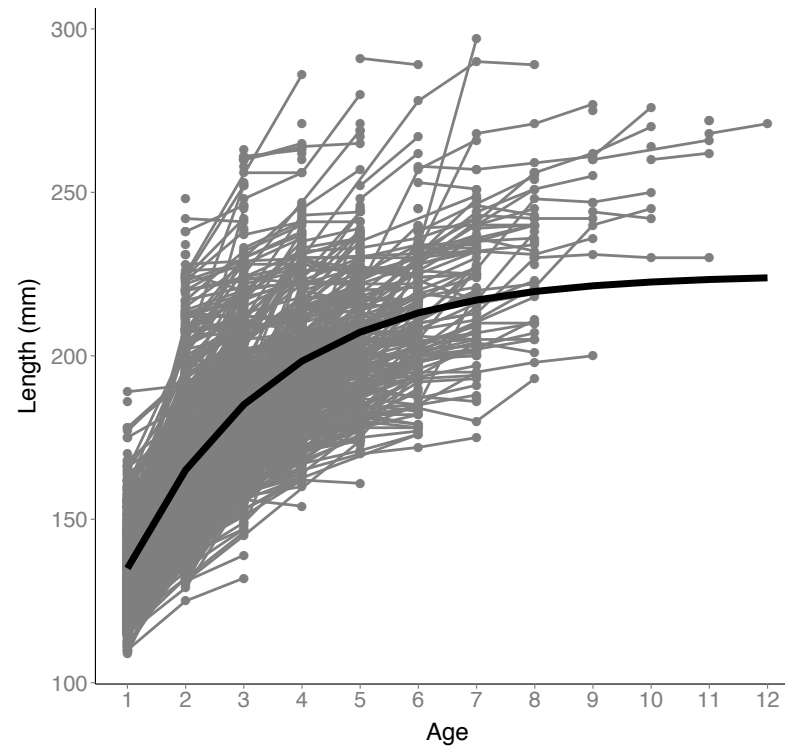

**Figure S3.** Individual growth trajectories of brown trout and prediction of the growth model of growth trajectory of the average fish in Eqs. (2.2) and (2.3) in the main text (see Avg in Table S6).

**Figure S4**

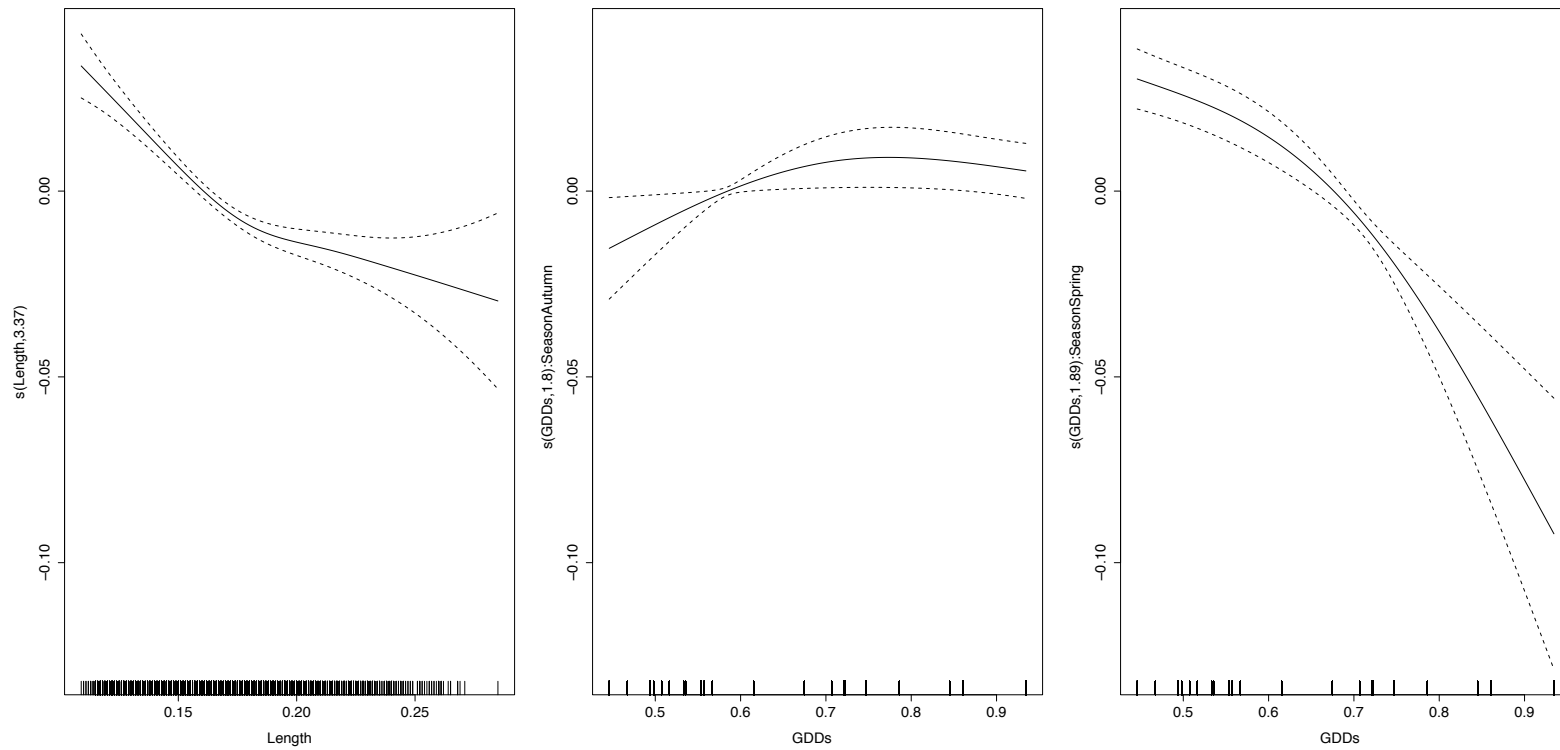

**Figure S4.** Plots of the effects on the response variable of the non-linear functions ( $L$  and  $GDDs$  by Season) of the best GAMM model of daily growth.



**Figure S5**

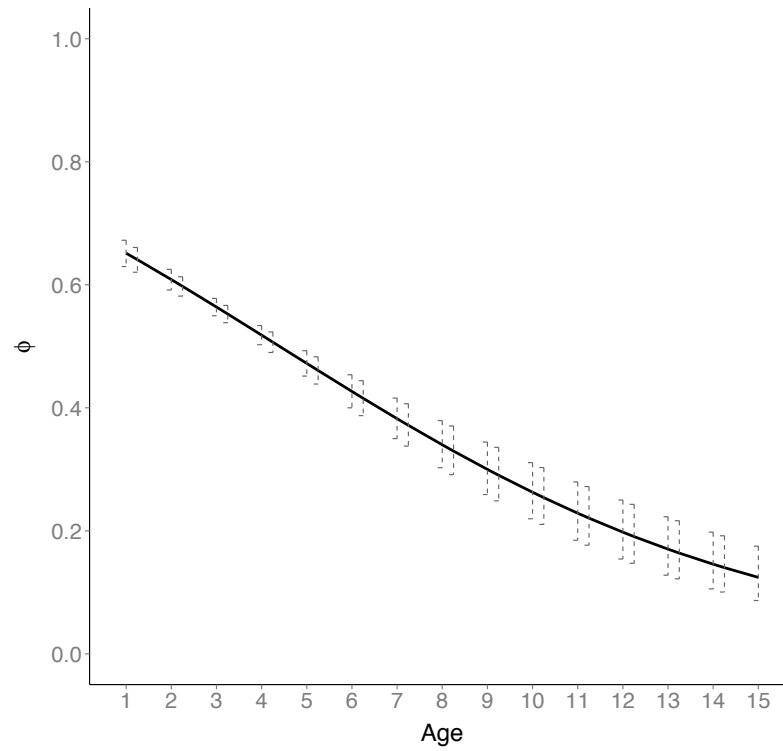

**Fig. S5.** Point estimates of probability of survival and 95% CI as a non-linear function of *Age* in the population of Upper Volaja (fish are aged 1 in June and 1.25 in September of the second year and so on).

**Figure S6**

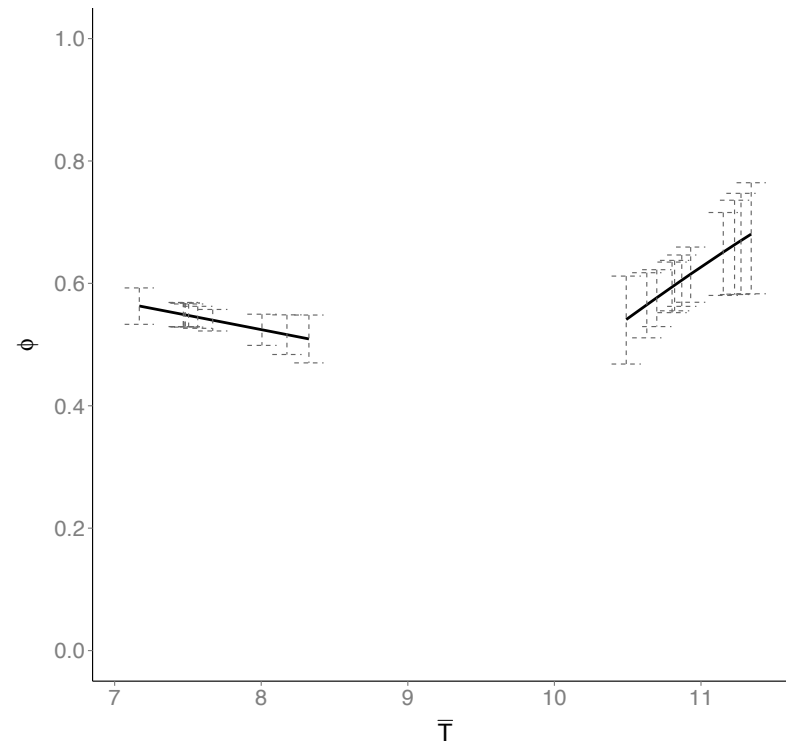

**Fig. S6.** Point estimates of probability of survival and 95% CI as a function of mean temperature within the sampling interval.

## Text S1

When a fish is sampled in September (1+ and older), the following occurrences are possible:

(1) Fish was in Upper Volaja when 0+ (fish born in the stream)

- 1.a fish was sampled when 0+ and the adipose (ad) fin was cut (+)
- 1.b fish was present and not sampled when 0+ (ad not cut)
  - o 1.b.1 fish was sampled at 1+ in June, smaller than 115 mm, and the ad was cut (+)
  - o 1.b.2 fish was sampled at 1+ in June, bigger than 115 mm (thus getting tagged), and the ad was not cut (-)
  - o 1.b.3 fish was not sampled at 1+ in June (missed in two occasions) and the ad was not cut (-)

(2) Fish was in Upper Volaja when 1+ in June but not when 0+

- 2.a fish was sampled when 1+ in June, smaller than 115 mm, and the ad was cut. (+)
- 2.b fish was sampled when 1+ in June, bigger than 115 mm (thus getting tagged), and the ad was not cut. (-)
- 2.c fish was not sampled when 1+ in June (ad was not cut).

(3) Fish was in Upper Volaja when 1+ in September or older, but not when 0+ or 1+ in June.

The two-pass removal and the estimation of capture rates of tagged fish indicate that the probability of sampling a fish when alive and present is between 0.85 and 0.90. Given the very high probability of capturing a fish when present (the point estimate for 0+ is the total number of fish aged 0+ sampled for almost all years), we assumed that 1.b was negligible (see Table S3 for

the estimates of density). Since 1+ in June with  $L < 115$  had the ad cut and ~43% of 1+ in June had  $L < 115$ , we cannot tease apart fish that were sampled when 0+ and fish that were sampled when 1+ in June and had  $L < 115$  (we cannot tease apart 1.a from 2.a). Therefore, we have to assign fish to “early incoming” group (which includes fish born in the stream and fish migrating from AW when at max aged 1+ in June, that is 1.a + 2.a + 2.b) and “late incoming” group (fish that migrate into the streams when older than age 1+ in June, that is (3)).

Given the high capture rates, we also assumed that 2.c. was negligible (it will tend to slightly increase the proportion of “early incomers”).

## Text S2

Our goal was to investigate the effects of mean temperature, early density, season, age, sampling occasion, and growth potential on variation in probability of survival of tagged fish using continuous covariates ( $D_{>0+}$ , mean temperature between sampling intervals  $\bar{T}$ ) at the same time of categorical predictors (*Cohort*, *Time*, *Season*).

Two probabilities can be estimated from a capture history matrix:  $\phi$ , the probability of apparent survival, and  $p$ , the probability that an individual is captured when alive (Thomson et al. 2009). In the following, for  $\phi$  we will simply use the term probability of survival.

We used the Cormack–Jolly–Seber (CJS) model as a starting point for the analyses (Thomson et al. 2009). The global starting model, that is the model with the maximum parameterization for categorical predictors, was different for each population. For both  $\phi$  and  $p$ , a multiplicative interaction between *Cohort* and *Time* (i.e. the interval between two consecutive sampling occasions) was included. We could not use the “true” global model of survival with interaction between *Cohort*, *Time*, and *Season* as the model failed to converge.

We tested the goodness-of-fit of the CJS model with the program Release. The global model was a good starting point to model survival and capture probabilities. All other survival models tested were simplified versions of this global starting model, with the potential addition of covariates. We modeled the seasonal effect (*Season*) as a simplification of full time variation, dividing each year in two periods: June to September (*Summer*) and September to June (*Winter*). Since the length of the two intervals (*Summer* and *Winter*) was different, we estimated probability of survival on a common annual scale.

We only tested models with a potential biological interpretation (see Online Code and Results). Normalized Akaike weights (AIC weights) represent the relative probability of a model being closest to the unknown process that generated the data (Burnham and Anderson 2002). From the global model, we first modeled recapture probability by allowing the recapture probability to vary among *Cohort*, *Time*, and *Season*. We then used the recapture model with the lowest AIC to model survival probabilities. Fixing the recapture probability component of the model allowed the survival component of the model to be compared, as any difference in AIC and AIC weight given to individual models would be due to the survival component (McCallum 2000).

Both *Age* and mean temperature between sampling intervals  $\bar{T}$  were introduced as either non-linear (as B-splines, Boor 2001) or linear predictors, while  $D_{>0+}$  was introduced only as a linear predictor. In addition, we tested whether, after taking account of *Cohort*, probability of survival of trout that was born in AW was different from that of fish born in Upper Volaja. In this case, we used a subset of the whole dataset that included cohorts born between 2004 and 2010 included.

Unless otherwise noted, in this work probability of survival  $\phi$  refers to an annual temporal scale. We use the symbol  $\sigma$  for probability of survival at the population level. We carried out the analysis of probability of survival using the package *marked* (Laake et al. 2013) for R. Tag-loss is not taken into account in *marked*, although the large number of samples and low proportion of fish losing their tag (<10%) should only slightly bias downwards the survival estimates.

### Text S3

Because fish were not tagged when 0+, we assumed a binomial process for estimating the probability  $\sigma_{0+}$  of first overwinter survival (0+ to 1+). We estimated survival by dividing the number of 0+ with the adipose fin cut in September by the estimated number of 1+ with the adipose fin cut in June. We did not use density of 0+ and 1+ the following year since newborns (and 1+ fish the following year before June sampling) can enter the sampling section after the September sampling, thus inflating the estimate of apparent survival. The estimate of the number of 1+ with the adipose fin cut ( $\hat{A}_{dc}$ ) is thus  $\hat{A}_{dc} = A_{dc} + (1 - p_s)A_{dc}$ , where  $A_{dc}$  is the sampled number of fish aged 1+ with the adipose fin cut and  $p_s$  is the probability of capture at time  $t$  of fish that were alive at time  $t$ . We estimated the standard error of the parameter of the binomial distribution using the delta method (Hilborn and Mangel 1997).

## **Ethics statement**

All sampling work was approved by the Ministry of Agriculture, Forestry and Food of Republic of Slovenia and the Fisheries Research Institute of Slovenia. Original title of the Plan: RIBSKO - GOJITVENI NACRT za TOLMINSKI RIBISKI OKOLIS, razen Soce s pritoki od izvira do mosta v Cezsoco in Krnskega jezera, za obdobje 2006–2011. Sampling was supervised by the Tolmin Angling Association (Slovenia).



## References

- Boor, C. de. 2001. *A Practical Guide to Splines*. Springer New York.
- Burnham, K. P., and D. R. Anderson. 2002. *Model Selection and Multimodel Inference: a Practical Information-Theoretic Approach*. Springer Verlag, New York.
- Elliott, J. M., M. A. Hurley, and R. J. Fryer. 1995. A new, improved growth model for brown trout, *Salmo trutta*. *Functional Ecology* 9:290–298.
- Hilborn, R., and M. Mangel. 1997. *The Ecological Detective*. Princeton University Press.
- Laake, J. L., D. S. Johnson, and P. B. Conn. 2013. marked: An R package for maximum-likelihood and MCMC analysis of capture-recapture data. *Methods in Ecology and Evolution* 4:885–890.
- McCallum, H. 2000. *Population Parameters: Estimation for Ecological Models*. Blackwell Science, Oxford.
- Thomson, D. L., E. G. Cooch, and M. J. Conroy. 2009. *Modeling Demographic Processes in Marked Populations*. Springer.
